# Supplementary material for: Influence of orientation mismatch on charge transport across grain boundaries in tri-isopropylsilylethynyl (TIPS) pentacene thin films
Source: Royal Society of Chemistry journal article supplement (doi:10.1039/c6cp06436a), 2017-01-01
Supplement: c6cp06436a1.pdf [file c6cp06436a1.pdf]

## ***Supporting information for: Influence of Orientation Mismatch on Charge Transport Across Grain Boundaries in Tri-isopropylsilylethynyl (TIPS) Pentacene Thin Films***<sup>†</sup>

Florian Steiner,<sup>a‡</sup> Carl Poelking,<sup>b‡</sup> Dorota Niedzialek,<sup>a</sup> Denis Andrienko,<sup>b</sup> and Jenny Nelson<sup>\*a</sup>

---

<sup>a</sup> Department of Physics and Centre for Plastic Electronics, Imperial College London, London SW7 2AZ; E-mail: [jenny.nelson@imperial.ac.uk](mailto:jenny.nelson@imperial.ac.uk)

<sup>b</sup> Max Planck Institute for Polymer Research, Ackermannweg 10, 55128 Mainz.

<sup>†</sup> Electronic Supplementary Information (ESI) available. See DOI: 10.1039/b000000x/

<sup>‡</sup> These authors contributed equally to this work.

## Supporting Information

### A A. Force-Field of TIPS-P

For atomistic molecular-dynamics simulations a force-field specific to TIPS-P is developed. The OPLS-AA force-field

$$\begin{aligned}
 E = & \sum_{i < j} 4\epsilon_{ij} \left[ \left( \frac{\sigma_{ij}}{r_{ij}} \right)^{12} - \left( \frac{\sigma_{ij}}{r_{ij}} \right)^6 \right] + \sum_{i < j} \frac{1}{4\pi\epsilon_r\epsilon_0} \frac{q_i q_j}{r_{ij}} \\
 & \sum_b \frac{1}{2} K_b (b - b_0)^2 + \sum_\theta \frac{1}{2} K_\theta (\theta - \theta_0)^2 \\
 & \sum_\xi \frac{1}{2} K_\xi (\xi - \xi_0)^2 + \sum_n c_n \cos^n(\phi - \phi_0)
 \end{aligned}
 \tag{1}$$

was adopted where the first two terms represent non-bonding interactions (Lennard-Jones and Coulomb potentials) and the last four terms relate to bonding interactions (bond, angle, improper dihedrals and dihedrals)<sup>1</sup>. For TIPS-P we define seven different atom identities that refer to OPLS-AA atom types (see Table 1).

| atom identity | opls number | atom type  | in forcefield |
|---------------|-------------|------------|---------------|
| Cxx           | opls_135    | alkane CH3 | CT            |
| Cx            | opls_136    | alkane CH2 | CT            |
| Hx or Hxx     | opls_140    | alkane H   | HC            |
| CAX           | opls_145    | benzene C  | CA            |
| HAX           | opls_146    | benzene H  | HA            |
| CTx           | opls_925    | alkyne     | CZ            |
| Six           | opls_966    | silicon    | SI            |

**Table 1** Symbols used in Figure 1 according OPLS-AA number and atom type. *x* stands for an arbitrary integer.

A Mulliken population analysis was conducted to compute atomic charges. The molecular geometry was optimised and atomic charges were calculated with hybrid density functional theory employing the hybrid functional B3LYP and a 6-311g(d,p) basis set. The results are given in Table 2. For all carbon and hydrogen atoms masses and Lennard-Jones parameters are taken from the OPLS-AA force-field. For silicon we use the Lennard-Jones parameters provided in reference<sup>2</sup> (SI:  $\epsilon_{ii} = 0.398$  kJ/mol and  $\sigma_{ii} = 0.4435$  nm).

In the following we discuss specifications for bond types, angle types and dihedral types (see Tables 3, 4 and 5. Parameters for bonds, angles and dihedrals between carbon and hydrogen atoms can be found in the OPLS-AA database and are not discussed here. Parameters concerning silicon are provided in the tables mentioned above.

Since silicon is a four-bonding atom like carbon, we consider for angles and dihedrals containing silicon OPLS-AA parameters for alkanic carbon (CT) or rely on previous parameters provided by Guilbert and co-workers<sup>3</sup> (see Tables 4 and 5). In terms of bonds, reference<sup>3</sup> provides the equilibrium bond length  $b_0$  and the force constant  $K_b$  for SI-CT. In contrast, the specifications of the bond SI-CZ are unknown.

We geometrically optimise TIPS-P with hybrid density functional theory (B3LYP/6-311g(d,p)). Accordingly, we iteratively vary the equilibrium bond length and the force constant of the SI-CZ bond in the force-field until all bond lengths agree in the molecular geometries from density functional theory and molecular mechanics. The result is provided in Table 3. Thereafter, the force-field was tested on a 3 x 3 TIPS-P supercell. We found that the supercell and the molecular geometries were stable.

| atom identity | Mulliken charge (C) | atom identity | Mulliken charge (C) |
|---------------|---------------------|---------------|---------------------|
| CA6           | -0.037903           | C61           | -0.280104           |
| CA5           | -0.024736           | H61           | 0.107321            |
| CAi           | -0.017368           | H62           | 0.104415            |
| CAh           | -0.031665           | H63           | 0.104267            |
| CA4           | 0.015652            | C62           | -0.281669           |
| CAj           | 0.014919            | H64           | 0.101288            |
| CAk           | -0.050873           | H65           | 0.100655            |
| CA3           | -0.062843           | H66           | 0.118958            |
| CA2           | -0.068552           | C41           | -0.281219           |
| HA2           | 0.090358            | H41           | 0.105783            |
| CA1           | -0.091045           | H42           | 0.104058            |
| CAm           | -0.088084           | H43           | 0.107806            |
| CAI           | -0.061955           | C42           | -0.280412           |
| HA4           | 0.133049            | H44           | 0.117911            |
| HAj           | 0.117454            | H45           | 0.100254            |
| HA1           | 0.095289            | H46           | 0.106212            |
| HAm           | 0.095368            | C51           | -0.287312           |
| HA1           | 0.084265            | H51           | 0.110784            |
| CA7           | -0.011951           | H52           | 0.102495            |
| CA8           | 0.015823            | H53           | 0.110066            |
| CAG           | -0.021739           | C52           | -0.285191           |
| HA8           | 0.123179            | H54           | 0.116829            |
| CAf           | 0.010026            | H55           | 0.102296            |
| HAf           | 0.137156            | H56           | 0.105284            |
| CA9           | -0.053162           | C3            | -0.50675            |
| CAa           | -0.063648           | H3            | 0.14054             |
| CAe           | -0.063644           | C31           | -0.276603           |
| CAb           | -0.0888             | H31           | 0.104923            |
| HAA           | 0.086942            | H32           | 0.106576            |
| CAd           | -0.068506           | H33           | 0.105829            |
| CAc           | -0.090646           | C32           | -0.291701           |
| HAb           | 0.095537            | H34           | 0.104434            |
| HAd           | 0.08922             | H35           | 0.10226             |
| HAc           | 0.09533             | H36           | 0.118824            |
| CT1           | 0.018347            | C21           | -0.279957           |
| CT2           | -0.533583           | H21           | 0.099471            |
| Si1           | 1.248732            | H22           | 0.099909            |
| C1            | -0.501642           | H23           | 0.123337            |
| H1            | 0.133081            | C22           | -0.279816           |
| C2            | -0.511432           | H24           | 0.106234            |
| H2            | 0.135603            | H25           | 0.105338            |
| CT3           | -0.01656            | H26           | 0.106848            |
| CT4           | -0.479566           | C11           | -0.281127           |
| Si2           | 1.227914            | H11           | 0.104692            |
| C4            | -0.501848           | H12           | 0.110457            |
| H4            | 0.128708            | H13           | 0.103015            |
| C5            | -0.497896           | C12           | -0.289291           |
| H5            | 0.128431            | H14           | 0.102442            |
| C6            | -0.510106           | H15           | 0.103687            |
| H6            | 0.137179            | H16           | 0.117847            |

Table 2 Mulliken charges per atom.



| angle    | $\theta_0$ (°) | $K_\theta$ (kJ/mol/rad <sup>2</sup> ) | source             |
|----------|----------------|---------------------------------------|--------------------|
| SI-CT-CT | 116.000        | 488.273                               | OPLS from CT CT CT |
| SI-CT-HC | 103.500        | 313.800                               | OPLS from CT CT HC |
| CT-SI-CT | 134.059        | 261.217                               | from <sup>3</sup>  |
| SI-CZ-CZ | 179.000        | 1255.20                               | OPLS from CT CZ CZ |
| CT-SI-CZ | 105.000        | 488.273                               | OPLS from CT CT CZ |

**Table 4** Angle-specific parameters.

$\pi$ -systems of TIPS-P which is the pentacene unit. This agrees with the location of the HOMO level (see Figure 2c).

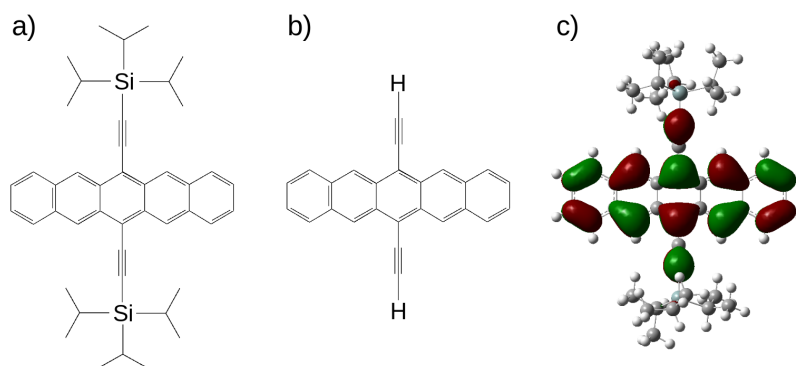

**Fig. 2** a) Full molecular structure of TIPS-P and b) simplified structure (right) for transfer integral calculations with MOO. c) HOMO of TIPS-P calculated with the hybrid functional B3LYP and the basis set 6-311g(d,p).

Table 6 compares transfer integrals calculated with the projective method on the full molecular structure of TIPS-P (Figure 2a) and with MOO on the reduced structure (Figure 2b). Transfer integrals computed with MOO are slightly higher than for the projective method. The two-dimensional nature of charge transport in TIPS-P is preserved when calculating transfer integrals with MOO.

## C C. Grain Boundaries in TIPS-P as a Network of Small Grains

Wong et al. suggested in reference<sup>6</sup> that grain boundaries in TIPS-P are built from small crystals that are connected to each other by small interfaces. In this section, we study the influence of such a configuration on charge transport. As the interconnectivity between small grains in the grain boundary is unknown, we consider 4 different cases: i) a one-dimensional chain with two connections per grain, ii) a two-dimensional honeycomb structure with three connections per grain, iii) a two-dimensional quadratic lattice with four connections per grain and iv) a two-dimensional hexagonal structure with six connections per grain (see Figure 3a). The distance between next neighbors is set to 1 and model structures are 20 x 20 large.

Each grain is approximated as a hopping-site during charge transport. This assumes that charge transport is limited by grain boundaries and not by the mobility anisotropy within TIPS-P grains (see reference<sup>7</sup>). In our model we consider small interfaces between grains. This allows us to use the results of the previous section for 40 Å wide stripes. For each angle  $\vartheta$  we computed 20 reduction factors  $\mu_{xial}/\mu$  describing the mobility reduction imposed by the grain boundary. Those are randomly assigned to each grain boundary between nano-crystals reducing the hopping rate from one grain to another by the drawn factor  $\mu_{xial}/\mu$ .

In terms of charge transport we consider two cases: a) all grains are well connected as if there are no grain boundaries in between them and b) the reduction factor  $\mu_{xial}/\mu$  is randomly drawn from all mutual angles  $[0^\circ, 90^\circ]$ ; electrostatic

| dihedral    | $\epsilon_1$<br>(kJ/mol) | $\epsilon_2$<br>(kJ/mol) | $\epsilon_3$<br>(kJ/mol) | $\epsilon_4$<br>(kJ/mol) | $\epsilon_5$<br>(kJ/mol) | $\epsilon_6$<br>(kJ/mol) | source                |
|-------------|--------------------------|--------------------------|--------------------------|--------------------------|--------------------------|--------------------------|-----------------------|
| CZ-SI-CT-HC | 0.76567                  | 2.29701                  | 0.00000                  | -3.06269                 | 0.00000                  | 0.00000                  | OPLS from CZ CT CT HC |
| CZ-SI-CT-CT | 0.00000                  | 0.00000                  | 0.00000                  | 0.00000                  | 0.00000                  | 0.00000                  | from <sup>3</sup>     |
| CZ-CZ-SI-CT | 0.00000                  | 0.00000                  | 0.00000                  | 0.00000                  | 0.00000                  | 0.00000                  | OPLS from alkynes     |
| CT-SI-CT-HC | 0.62760                  | 1.88280                  | 0.00000                  | -2.51040                 | 0.00000                  | 0.00000                  | OPLS from CT CT CT HC |
| CT-SI-CT-CT | 2.92880                  | -1.46440                 | 0.20920                  | -1.67360                 | 0.00000                  | 0.00000                  | OPLS from CT CT CT CT |
| SI-CT-CT-HC | 0.62760                  | 1.88280                  | 0.00000                  | -2.51040                 | 0.00000                  | 0.00000                  | OPLS from CT CT CT HC |
| CA-CZ-CZ-SI | 0.00000                  | 0.00000                  | 0.00000                  | 0.00000                  | 0.00000                  | 0.00000                  | OPLS form alkynes     |

Table 5 Dihedral-specific parameters.

| vector     | $J_{ProjectiveMethod}$<br>(meV) | $J_{MOO}$<br>(meV) |
|------------|---------------------------------|--------------------|
| <b>a</b>   | 53.7                            | 85.7               |
| <b>b</b>   | 0.21                            | 0.71               |
| <b>c</b>   | 1.17                            | 2.13               |
| <b>a-b</b> | 64.8                            | 70.0               |

**Table 6** Transfer integrals calculated with the molecular orbital overlap method (MOO) and the projective method<sup>4</sup>. **a**, **b** and **c** are the unit cell vector of TIPS-P from reference<sup>5</sup>

only and electrostatic and induction are considered. All reduction factors are corrected by the mobility ratio  $\mu_{Xtal}/\mu$  of the complete,  $400 \times 400 \text{ \AA}^2$  structures with parallel grains since this is the case where both grains crystalized, charge transport is unconfined and only disorder within the grain plays a role.

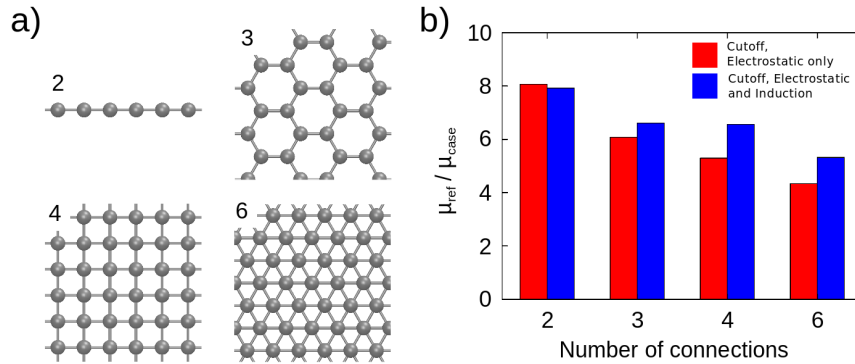

**Fig. 3** Grain boundaries as a network of nano-crystals. a) Model for nano-crystals with different connectivity to neighbouring grains. Spheres represent grains and bonds refer to connections between spheres. The number indicates how many next neighbours there are. b) Mobility ratios between a perfectly connected grid  $\mu_{ref}$  and a network with variation in connectivity  $\mu_{case}$ . Reduced connection due to grain boundaries are represented by individual (not the average) mobility reductions factors from  $4 \times 40 \text{ nm}^2$  stipe structures. All angles are considered.

The results of kinetic Monte-Carlo simulations are provided in Figure 3b. Mobilities are calculated from average velocities utilising regenerative contacts. The reference mobility  $\mu_{ref}$  refers to the case of perfectly connected grains while the mobility  $\mu_{case}$  relates to the case of reduced connectivity between grains due to small, 4 nm wide grain boundaries (see cases a) and b) from above). The higher the number of connections between grains the lower is the effect of grain boundaries reaching from a mobility ratio  $\mu_{ref}/\mu_{case}$  of around 8 to 4 for two and six connections respectively. More connections allow charge carriers to avoid grain boundaries with a strong blocking effect.

## D D. Energy Surface for Varied Mutual Angles

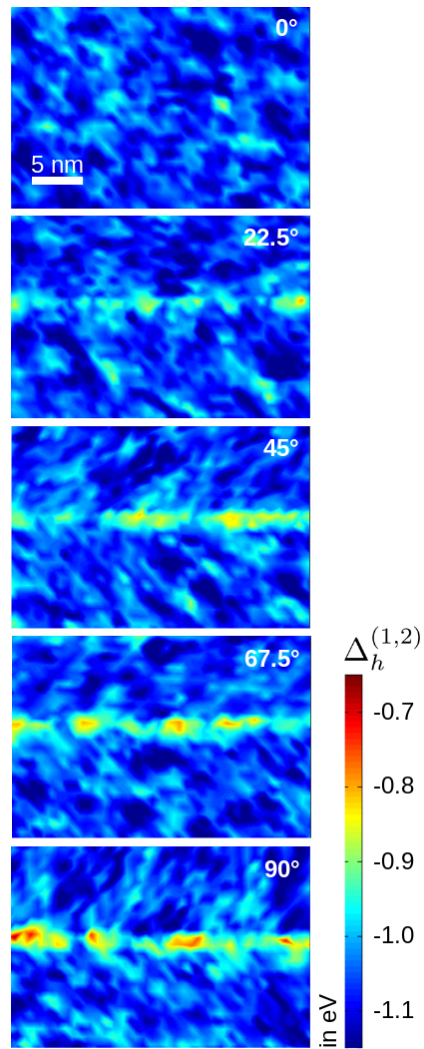

**Fig. 4** Energy surfaces of representative two-grain structures for each mutual angle. Energy calculations consider contributions from electrostatics and induction.



## E E. Transfer Integral Distribution for Varied Mutual Angles

The effect of varying mutual angle on transfer integrals is shown in Figure 5.

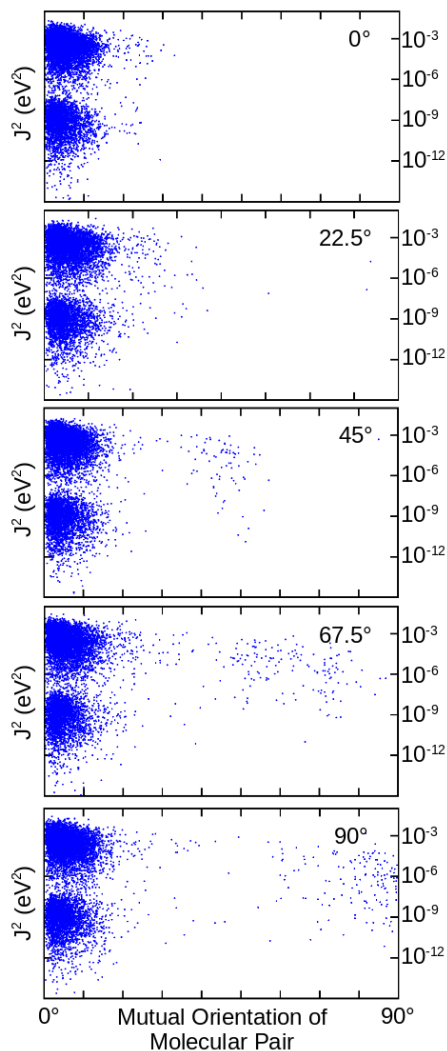

Fig. 5 Transfer integrals calculated for representative two-grain structures for each mutual angle.

## F F. Statistics for Two Grains with Varied Mutual Angle

In the main text, charge transport is simulated for large, quadratic structures ( $40 \times 40 \text{ nm}^2$ ) and stripes perpendicular to the grain boundary ( $4 \times 40 \text{ nm}^2$ ). For large structures, we considered 5 molecular assemblies per angle while we simulated charge transport on 20 stripes per angle. Mobilities resulting from kinetic Monte-Carlo vary. This section aims to quantify this variation. The used metric are mobility ratios of the ideal crystal  $\mu_{Xtal}$ , the molecular dynamics molecular assemblies without energetic disorder  $\mu_{E=const}$  or the molecular dynamics molecular structures with energetic disorder  $\mu$  (with different cases for site energies).

For the large,  $40 \times 40 \text{ nm}^2$  structures the standard deviations of the mobility ratios are relatively small compared to the average value (see Figure 6). In contrast, the values of the standard deviations of the mobility ratios for stripes are similar to their average values (see Figure 7). In the case of  $\mu/\mu_{E=const}$  standard deviations increase towards large mutual angles. This can be explained by the non-uniform barrier height between grains combined with the increase peak barrier heights for larger mutual angles.

Thus, the average mobility ratio values for large structures are very reliable. Large interfaces between TIPS-P grains

do not seem to impede charge transport. For small inter-granular interfaces charge carrier mobilities are on average more reduced than for large mutual angles. Due to the large standard deviation, charge transport across small grain boundaries might be much better or worse. A simple model, how this variance will affect charge transport in nano-crystalline grain interfaces in TIPS-P is provided in Supporting Information C.

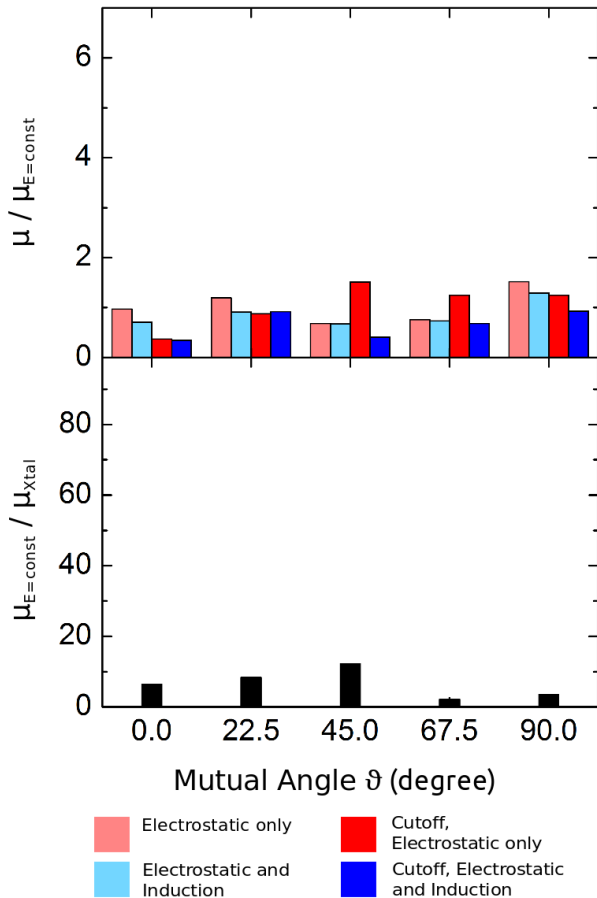

**Fig. 6** Standard deviations of mobility ratios for large,  $40 \times 40 \text{ nm}^2$  structures.  $\mu_{Xtal}$  refers to the mobility of ideal crystal structure<sup>5</sup>,  $\mu_{E=const}$  relates to the mobility of the molecular dynamics molecular assembly without energetic disorder and  $\mu$  is the mobility of the molecular dynamics molecular assembly including energetic disorder considering different cases.

## G G. Randomly Grown Multi-Grain Systems of TIPS-P

In the main text, structures with two grains and one linear grain boundary are simulated. Here, we model probabilistically grown, multi-grain structures. Charge transport parameters and charge transport is simulated as described in the main text. Furthermore, we track charge carriers and compute their accumulated occupation time per site allowing for a characterisation of the general charge transport behaviour in multi-crystalline films of TIPS-P.

Molecular assemblies are initially prepared with an algorithm probabilistically simulating the growth of grains. At first, the number of grains is chosen. Accordingly, seeds are randomly placed on a two-dimensional surface. Seeds are molecules that are oriented with 0, 22.5, 45, 67.5 or 90 degrees compared to the **a**-vector of the TIPS-P unit cell. Grains can grow in the **a** and **b** direction of the TIPS-P crystal structure. The initial seeds are the first generation of molecules. For every following generation, the probability to grow is reduced by a factor of 10 ensuring grains of similar size. The code avoids overlapping of molecules when one grain reaches another one. The process of placing molecules is repeated until a predefined number of molecules has been placed. Accordingly, the molecular assemblies are equilibrated with atomistic molecular dynamics as described in the main text for two-grain systems. An example structure is provided in Figure 8a.

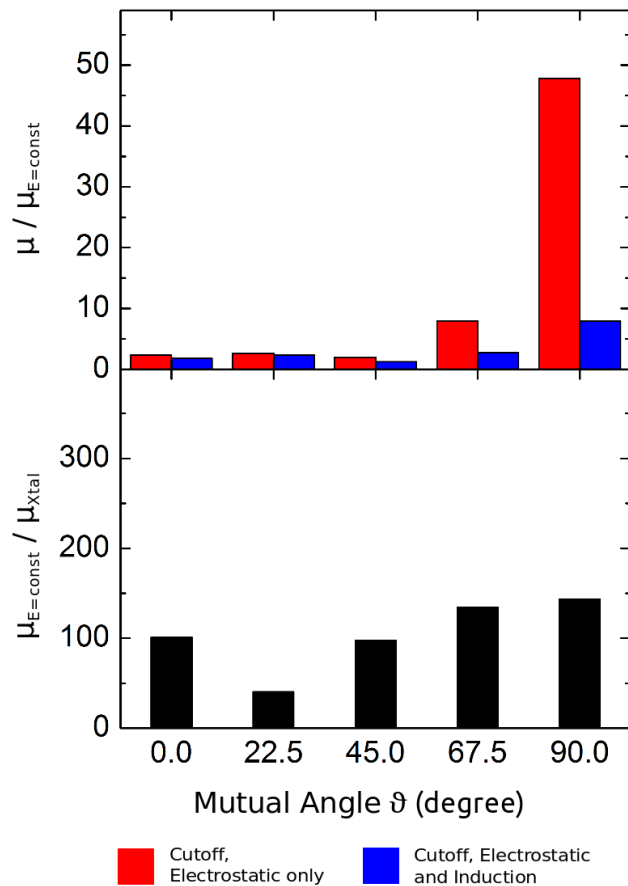

**Fig. 7** Standard deviations of mobility ratios for  $4 \times 40 \text{ nm}^2$  stripes.  $\mu_{Xtal}$  refers to the mobility of ideal crystal structure<sup>5</sup>,  $\mu_{E=const}$  relates to the mobility of the molecular dynamics molecular assembly without energetic disorder and  $\mu$  is the mobility of the molecular dynamics molecular assembly including energetic disorder considering different cases.

The energy surface referring to calculations including electrostatics and induction is depicted in Figure 8b. Energy barriers between grains are particularly high for interfaces with large mutual angle. Moreover, we observe high potential energies for hole transport when three grains join each other. This is not surprising as the multipole moments of the three grains are not aligned. Additionally, voids distort the energy surface and significantly influencing the site energies of adjacent molecules. As mentioned previously, the energy barriers are non-uniform and allow charge carriers to cross at reduced energy cost.

Figures 8c and d show accumulated occupation times of charge carriers during 1 s of charge transport. The orientation of the applied electric field  $F$  indicates the direction of charge transport. Dark blue areas relate to regions where no charge transport happens. Yellow and red areas refer to molecules where charge carriers are blocked from traveling. Bright blue areas are regions where good charge transport occurs. This is mainly the case within grains. We observe that charge transport is impeded by large barriers, at regions where three grains join each other and at voids.

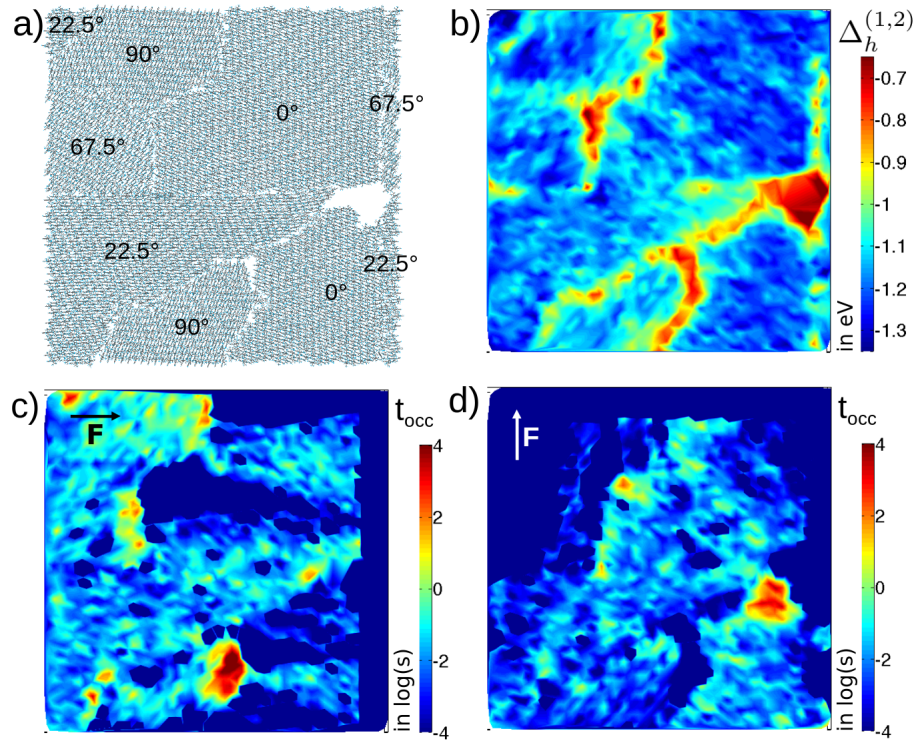

**Fig. 8** Charge transport in multi-grain structures of TIPS-P. a) Equilibrated molecular dynamics structure, b) energy surface calculated including contributions of electrostatics and induction, c) and d) accumulated occupation times during 1 s of charge transport simulations. The orientation of the electric field  $F$  indicates the direction of charge transport.

## H H. Alternative Representation of Transport Data

In this section, average mobilities are obtained using mobility ratios that are flipped compared to the main paper. This effectively means considering the average conductance rather than the average resistance. In a networked granular system of unknown structure, it is not definite which average would be more appropriate. In the case, we do not observe a clear trend towards larger angles. In the representation of Figure 3b in the main text, the average was dominated by few, large mobility reductions. The effect of those outliers are less pronounced when inverting the mobility ratios (see Figure 10).

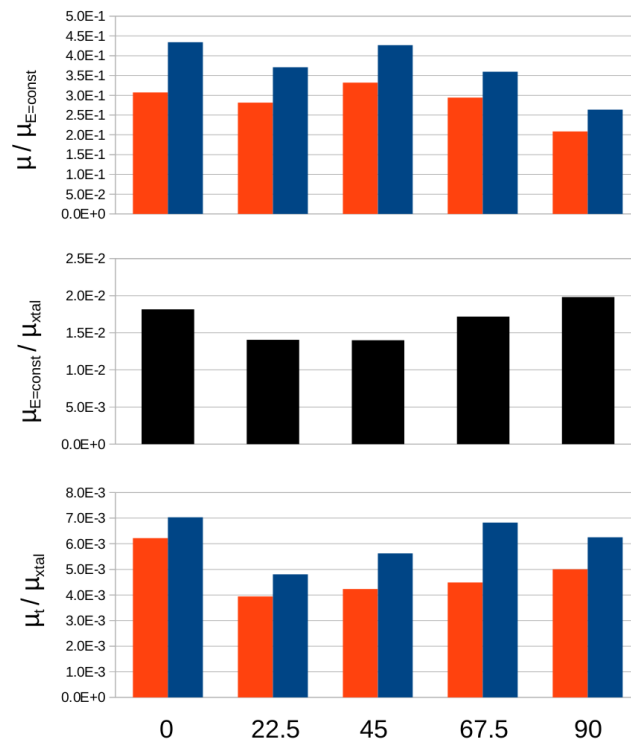

**Fig. 9** Average mobility ratios for large 40 x 40 nm<sup>3</sup> structures. Mobility ratios are flipped compared to Figure 3a.

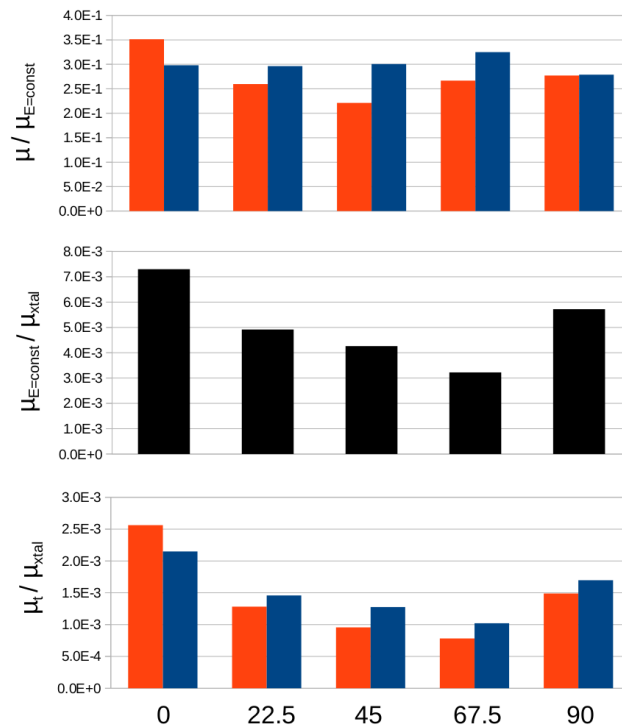

**Fig. 10** Average mobility ratios for large 4 x 40 nm<sup>3</sup> structures. Mobility ratios are flipped compared to Figure 3b.

## References

- 1 W. L. Jorgensen, D. S. Maxwell and J. Tirado-Rives, *J. Am. Chem. Soc.*, 1996, **118**, 11225–11236.

- 2 J. C. G. Pereira, C. R. A. Catlow and G. D. Price, *The Journal of Physical Chemistry A*, 2002, **106**, 130–148.
- 3 A. A. Y. Guilbert, J. M. Frost, T. Agostinelli, E. Pires, S. Lilliu, J. E. Macdonald and J. Nelson, *Chemistry of Materials*, 2014, **26**, 1226–1233.
- 4 J. Kirkpatrick, *Int. J. Quantum Chem.*, 2008, **108**, 51–56.
- 5 J. E. Anthony, J. S. Brooks, D. L. Eaton and S. R. Parkin, *J. Am. Chem. Soc.*, 2001, **123**, 9482–9483.
- 6 C. Y. Wong, B. L. Cotts, H. Wu and N. S. Ginsberg, *Nature communications*, 2015, **6**, year.
- 7 J. Wade, F. Steiner, D. Niedzialek, D. T. James, Y. Jung, D.-J. Yun, D. D. Bradley, J. Nelson and J.-S. Kim, *Journal of Materials Chemistry C*, 2014, **2**, 10110–10115.
